# Supplementary material for: Reinforcement Learning for Clinical Decision Support in Critical Care: Comprehensive Review
Source: J Med Internet Res. 2020 Jul 20;22(7):e18477. doi: 10.2196/18477 (PMC7400046; doi:10.2196/18477)
Supplement: Multimedia Appendix 2 [file jmir_v22i7e18477_app2.pdf]

**Table 2.** Summary of study characteristics.

| Reference             | Category                 | Purpose                                                                                  | Disease/symptom | Number of patients | Main method                                 | Evaluation                                                                                                                                     | Relevant outcome                                                                                                                                                                                              | Data source            |
|-----------------------|--------------------------|------------------------------------------------------------------------------------------|-----------------|--------------------|---------------------------------------------|------------------------------------------------------------------------------------------------------------------------------------------------|---------------------------------------------------------------------------------------------------------------------------------------------------------------------------------------------------------------|------------------------|
| Weng et al, 2017 [37] | Optimal laboratory value | To find personalized target laboratory values as references for clinical decision making | Sepsis          | 5565               | Policy iteration                            | (1) Computed the empirically estimated mortality rate of the real glycemic trajectory; (2) Plot expected return with respect to mortality rate | (1) Learned optimal policy could reduce the patients' estimated 90-day mortality rate by 6.3%, from 31% to 24.7%; (2) Plot showed a negative correlation                                                      | MIMIC <sup>a</sup> III |
| Wang et al, 2018 [38] | Medication choice        | To find the time-varying medications according to the dynamic states of patients         | NA <sup>b</sup> | 22,865             | Actor-critic network with LSTM <sup>c</sup> | (1) Plot estimated in-hospital mortality rates versus expected return; (2) Estimate the hospital mortality by following RL <sup>d</sup> policy | (1) The plot of estimated mortality showed inverse relationship with regard to expected return; (2) Estimated hospital mortality was reduced by 4.4% by following the RL policy compared with hospital policy | MIMIC III              |

|                         |                                                |                                                                                                                         |                                                                          |      |                                                                      |                                                                                                                                                                          |                                                                                                                                                                                                                                                                                                                                                                                 |           |
|-------------------------|------------------------------------------------|-------------------------------------------------------------------------------------------------------------------------|--------------------------------------------------------------------------|------|----------------------------------------------------------------------|--------------------------------------------------------------------------------------------------------------------------------------------------------------------------|---------------------------------------------------------------------------------------------------------------------------------------------------------------------------------------------------------------------------------------------------------------------------------------------------------------------------------------------------------------------------------|-----------|
| Prasad et al, 2017 [34] | Optimal timing; optimal dosing of a medication | To find the best timing of on/off invasive MV <sup>e</sup> ; to infuse the optimal dosing of sedation (propofol)        | Patients in ICUs <sup>f</sup> who need to be supported with invasive MV. | 2464 | FQI <sup>g</sup> with tree regressor and neural network as regressor | Calculate the degree of consistency between learnt FQI policy and hospital policy in terms of MV setting and dosing of propofol                                          | For the timing of MV, the learnt RL policy matched hospital policy in 85% of transitions. For dosing of propofol, RL policy achieved 58% accuracy                                                                                                                                                                                                                               | MIMIC III |
| Cheng et al, 2019 [35]  | Optimal timing                                 | To find optimal timing of order the 4 laboratory test (WBC <sup>h</sup> , creatinine, lactate, and blood urea nitrogen) | Sepsis or acute renal failure                                            | 6060 | FQI with multiobjective Gaussian process                             | (1) Reduction in SOFA <sup>i</sup> score; (2) Treatment onset after taking a laboratory test; (3) Laboratory redundancy (information gain); (4) Absolute laboratory cost | (1) The RL agent outperforms the hospital policy across all reward components; (2) Time intervals for treatment is higher in hospital policy than RL policy across all 4 laboratory tests; (3) The mean information in laboratory tests ordered by physicians is consistently outperformed by RL policy: for WBC, 44% reduction; for lactate, 27% reduction in number of orders | MIMIC III |

|                         |                                                |                                                                                                    |                                                            |      |                                |                                                                                                               |                                                                                                                                                                                                                                                                                                                                                                                                                  |                |
|-------------------------|------------------------------------------------|----------------------------------------------------------------------------------------------------|------------------------------------------------------------|------|--------------------------------|---------------------------------------------------------------------------------------------------------------|------------------------------------------------------------------------------------------------------------------------------------------------------------------------------------------------------------------------------------------------------------------------------------------------------------------------------------------------------------------------------------------------------------------|----------------|
| Yu et al, 2019 [36]     | Optimal timing; optimal dosing of a medication | To find the best timing of on/off invasive MV; to infuse the optimal dosing of sedation (propofol) | Patients in ICUs who need to be supported with invasive MV | 707  | FQI with Bayesian inverse RL   | (1) Calculate percentage of consistency of FQI policy and hospital policy; (2) Rank feature importance        | (1) RL policy matches 53.5% of the joint action of physicians, with 99.6% consistency in ventilation action and 53.9% in sedative action; (2) Feature importance showed that physicians pay more attention to patients' physiological stability (eg, heart rate and respiration rate), rather than oxygenation criteria (FiO <sub>2</sub> <sup>j</sup> , PEEP <sup>k</sup> , and SpO <sub>2</sub> <sup>l</sup> ) | MIMIC III      |
| Borera et al, 2011 [20] | Optimal dosing of a medication                 | To find optimal dosing of sedation (propofol) for a target BIS <sup>m</sup> value                  | NA                                                         | 1000 | Q-learning with neural network | Calculate the median performance error, the median absolute performance error, and the root mean square error | The median performance error was 0.02%, the median absolute performance error was 0.84% and the root mean square error was 3.8 BIS for the RL agent                                                                                                                                                                                                                                                              | Simulated data |

|                              |                                |                                                                                            |    |    |                                                        |                                                                                                                                              |                                                                                                                                                                                                                                                                                   |                |
|------------------------------|--------------------------------|--------------------------------------------------------------------------------------------|----|----|--------------------------------------------------------|----------------------------------------------------------------------------------------------------------------------------------------------|-----------------------------------------------------------------------------------------------------------------------------------------------------------------------------------------------------------------------------------------------------------------------------------|----------------|
| Padmanabhan et al, 2015 [21] | Optimal dosing of a medication | To find dosing of sedation (propofol) while maintaining the MAP <sup>n</sup> value         | NA | 30 | Epsilon-greedy policy iteration                        | Evaluate the target values of the BIS and MAP using median performance error, median absolute performance error, and root mean square error. | The median performance error, median absolute performance error, root mean square error for BIS were 3.97%, 4.19% and 2.12-3.30 respectively; The median performance error, median absolute performance error, and root mean square error for MAP were 4.05%, 5.31% and 2.30-9.50 | Simulated data |
| Padmanabhan et al, 2017 [22] | Optimal dosing of a medication | To achieve target BIS value while adjusting dosing of sedation (propofol and remifentanil) | NA | 25 | Q-learning                                             | Calculate mean performance error, the median performance error, and median absolute performance error                                        | For propofol and remifentanil the mean performance error was 0.61%, the median performance error was 0.11% and the median absolute performance error was 0.27%                                                                                                                    | Simulated data |
| Padmanabhan et al, 2019 [23] | Optimal dosing of a medication | To achieve target BIS value while adjusting dosing                                         | NA | 10 | Actor-critic network with prespecified pharmacological | Plot the BIS value with respect to time for different                                                                                        | Patients with different states show that the proposed RL agent can achieve robustness to                                                                                                                                                                                          | Simulated data |

|                           |                                |                                                  |                                                                            |            |                                   |                                                                                                                               |                                                                                                                                                                                             |                         |
|---------------------------|--------------------------------|--------------------------------------------------|----------------------------------------------------------------------------|------------|-----------------------------------|-------------------------------------------------------------------------------------------------------------------------------|---------------------------------------------------------------------------------------------------------------------------------------------------------------------------------------------|-------------------------|
|                           |                                | of sedation (propofol)                           |                                                                            |            | math model of a simulated patient | infusion rate of propofol over time                                                                                           | pharmacological parameters differences and provide an optimal dosing of propofol                                                                                                            |                         |
| Nemati et al, 2016 [6]    | Optimal dosing of a medication | To find optimal dosing of unfractionated heparin | Patients who received a heparin intravenous infusion during their ICU stay | 4470       | FQI with neural network           | Plot average reward versus discrepancy between the RL agent policy and hospital policy                                        | From the plot, on average and consistently over time, following the recommendations of the RL agent results in the best long-term performance (accumulated reward)                          | MIMIC II                |
| Ghassemi et al, 2018 [24] | Optimal dosing of a medication | To find optimal dosing of unfractionated heparin | Patients who received a heparin intravenous infusion                       | 4470       | Policy gradient RL                | Accuracy and AUC <sup>o</sup> for the RL agent compared with the hospital policy                                              | Accuracy for the RL agent was 58%, and AUC was 0.73                                                                                                                                         | MIMIC III               |
| Lin et al, 2018 [25]      | Optimal dosing of a medication | To find optimal dosing of unfractionated heparin | Patients admitted to ICUs with the need for infusion of heparin            | 2598; 2310 | Actor-critic network              | (1) Plot average reward versus discrepancy between the RL agent policy and hospital policy; (2) Regression over treatment and | (1) When there is no discrepancy between RL agent and hospital, the reward is highest from the plot; (2) RL policy has significant association with anticoagulant complications ( $P<.05$ ) | MIMIC III; Emory Health |

|                        |                                |                                                                  |        |        |                                      |                                                                                                                                                                                |                                                                                                                                                                                                             |           |
|------------------------|--------------------------------|------------------------------------------------------------------|--------|--------|--------------------------------------|--------------------------------------------------------------------------------------------------------------------------------------------------------------------------------|-------------------------------------------------------------------------------------------------------------------------------------------------------------------------------------------------------------|-----------|
|                        |                                |                                                                  |        |        |                                      | complication outcome                                                                                                                                                           |                                                                                                                                                                                                             |           |
| Raghu et al, 2017 [27] | Optimal dosing of a medication | To find the optimal dosing of intravenous fluid and vasopressors | Sepsis | 17,898 | Double DQN <sup>p</sup> with dueling | Plot observed mortality versus the difference between the dosages recommended by RL agent and hospital                                                                         | The plot shows a V-shape curve, whereas mortality is lowest when there is no discrepancy between RL agent and hospital policy                                                                               | MIMIC III |
| Raghu et al, 2017 [26] | Optimal dosing of a medication | To find the optimal dosing of intravenous fluid and vasopressors | Sepsis | 17,898 | Double DQN with dueling              | (1) Compute empirically derived function of proportion of mortality versus expected return; (2) Compute the mean discounted return of chosen actions under the hospital policy | (1) Estimated mortality was 13.9 % for hospital policy and it is improved up to 4% if follow RL agent policy; (2) Expected return for physician was 9.87 and this value was increased to 10.73 for RL agent | MIMIC III |

|                             |                                |                                                                  |        |                |                              |                                                                                                                                                                      |                                                                                                                                                                                                                                                                                                                                                              |                          |
|-----------------------------|--------------------------------|------------------------------------------------------------------|--------|----------------|------------------------------|----------------------------------------------------------------------------------------------------------------------------------------------------------------------|--------------------------------------------------------------------------------------------------------------------------------------------------------------------------------------------------------------------------------------------------------------------------------------------------------------------------------------------------------------|--------------------------|
| Raghu et al, 2018 [28]      | Optimal dosing of a medication | To find the optimal dosing of intravenous fluid and vasopressors | Sepsis | 17,898         | Model-based RL               | Policy evaluation includes the use of the (1) Per-horizon weighted Importance sampling, (2) Per-horizon weighted doubly robust, and (3) Approximate model estimators | Highest value for per-horizon weighted Importance sampling and per-horizon weighted doubly robust was 12.1 and 12.8 respectively when following hospital policy in low and high SOFA group, and follow RL agent policy in medium SOFA group; Highest value for approximate model was 9.36 when following hospital policy in low, medium and high SOFA groups | MIMIC III                |
| Komorowski et al, 2018 [15] | Optimal dosing of a medication | To find the optimal dosing of intravenous fluid and vasopressors | Sepsis | 17,083; 79,073 | Policy Iteration             | Plot mortality versus dosing discrepancy between RL agent and hospital policy                                                                                        | From the plot, the patients who received the treatments suggested by the AI <sup>9</sup> clinician had the lowest mortality rate                                                                                                                                                                                                                             | MIMIC III; eRI           |
| Futoma et al, 2018 [29]     | Optimal dosing of a medication | To find the optimal dosing of intravenous                        | Sepsis | 9255           | Multioutput Gaussian process | (1) Plot estimated mortality versus value of RL policy;                                                                                                              | (1) The mortality-value plot showed a negative association; (2) The                                                                                                                                                                                                                                                                                          | Duke University Hospital |

|                       |                                |                                                                  |        |        |                           |                                                                                                                                                                     |                                                                                                                                                                                                                                                                             |           |
|-----------------------|--------------------------------|------------------------------------------------------------------|--------|--------|---------------------------|---------------------------------------------------------------------------------------------------------------------------------------------------------------------|-----------------------------------------------------------------------------------------------------------------------------------------------------------------------------------------------------------------------------------------------------------------------------|-----------|
|                       |                                | fluid, vasopressors, and antibiotics                             |        |        | deep recurrent Q-networks | (2) Plot estimated mortality versus discrepancy between the dosages recommended by RL agent and hospital                                                            | mortality-discrepancy plot showed a V-shape curve, where the mortality is lowest when there is no discrepancy between the RL policy and the hospital policy                                                                                                                 |           |
| Peng et al, 2018 [30] | Optimal dosing of a medication | To find the optimal dosing of intravenous fluid and vasopressors | Sepsis | 15,415 | DQN with kernel method    | Off-policy evaluation via the weighted doubly robust estimator                                                                                                      | The DQN with kernel model has a weighted doubly robust value of 5.72 which outperformed the physician's value of 3.76                                                                                                                                                       | MIMIC III |
| Lee et al, 2019 [31]  | Optimal dosing of a medication | To find the optimal dosing of vasopressors                       | Sepsis | 17,898 | Inverse RL                | (1) Plot the learnt reward with respect to patient's vitals; (2) Calculate the proportion of the RL-recommended action in the physicians' actions for each discrete | (1) The IRL' model places higher rewards on high vasopressor for patients with low platelet counts, low blood pressure and high heart rate and no vasopressor is preferred when the platelet counts, blood pressure and heart rate are stable; (2) The recommend action for | MIMIC III |

|                                 |                                |                                        |        |      |                                    |                                                                                                        |                                                                                                                                                          |                                |
|---------------------------------|--------------------------------|----------------------------------------|--------|------|------------------------------------|--------------------------------------------------------------------------------------------------------|----------------------------------------------------------------------------------------------------------------------------------------------------------|--------------------------------|
|                                 |                                |                                        |        |      |                                    | dosage bin of vasopressors                                                                             | dosing range of vasopressors match on average 80% of those actions by clinicians in the data                                                             |                                |
| Petersen et al, 2018 [33]       | Optimal dosing of cytokine     | To find the optimal dosing of cytokine | Sepsis | 500  | Deep deterministic policy gradient | Calculate the mortality rate for the simulated patients from the IIRABM <sup>s</sup> close-loop system | The learned treatment strategy was showed to achieve 0.8% mortality over 500 randomly selected patient parameterizations with mortalities average of 49% | Simulated patients with IIRABM |
| Lopez-Martinez et al, 2019 [32] | Optimal dosing of a medication | To find the optimal dosing of morphine | Pain   | 6843 | Double DQN with dueling            | Plotting the RL agent actions versus physician's actions                                               | The actions recommended from the model for the 94.2% instances in which physicians chose to withhold morphine                                            | MIMIC III                      |

<sup>a</sup>MIMIC: Medical Information Mart for Intensive Care.

<sup>b</sup>NA: not applicable

<sup>c</sup>LSTM: long short-term memory.

<sup>d</sup>RL: reinforcement learning.

<sup>e</sup>MV: mechanical ventilation.

<sup>f</sup>ICU: intensive care unit.

<sub>g</sub>FQI: fitted-Q-iteration.

<sub>h</sub>WBC: white blood cell.

<sub>i</sub>SOFA: sequential organ failure assessment

<sub>j</sub>FiO<sub>2</sub>: fraction of inspired oxygen

<sub>k</sub>PEEP: positive end-expiratory pressure

<sub>l</sub> SpO<sub>2</sub>: oxygen saturation

<sub>m</sub>BIS: bispectral index.

<sub>n</sub>MAP: mean arterial pressure.

<sub>o</sub>AUC: area under the receiver operating characteristic curve

<sub>p</sub>DQN: deep Q network.

<sub>q</sub>AI: artificial intelligence

<sub>r</sub>IRL: inverse reinforcement learning

<sub>t</sub>IIRABM: innate immune response agent-based model.
